# Supplementary material
Source: Research Square preprint supplement (doi:10.21203/rs.3.rs-9774628/v1)
Supplement: Supplementary file 1 [file f0b61dabfbcec586fd7b9380.docx]

**Supplemental File 1**

*Citation Information for Included Publications*

Ahlqvist, S. (2014). *Reducing the gender gap in science, technology, engineering, and math fields: Developmental and experimental extensions of the perceived identity compatibility model* (2015-99120-208) [Stony Brook University]. <https://www.proquest.com/docview/1594942041/F1BECCFC3FD24B20PQ/1?accountid=14588&sourcetype=Dissertations%20&%20Theses>

Allaire, F. S. (2018). Themes from a Narrative Analysis of Native Hawaiian Experiences in Science, Technology, Engineering, and Mathematics. *Journal of Ethnographic and Qualitative Research*, *12*(3), 173–192.

Appleby, K., Bullinger, B., & Schneider, A. (2018). STEM selves: Women’s identity projects and their assessment of future employers in technical fields. *Scandinavian Journal of Management*, *34*(4), 311–325. <https://doi.org/10.1016/j.scaman.2018.09.001>

Avraamidou, L. (2020). “I Am a Young Immigrant Woman Doing Physics and on Top of That I Am Muslim”: Identities, Intersections, and Negotiations. *Journal of Research in Science Teaching*, *57*(3), 311–341. <https://doi.org/10.1002/tea.21593>

Avraamidou, L. (2022). Identities in/out of physics and the politics of recognition. *Journal of Research in Science Teaching*, *59*(1). <https://doi.org/10.1002/tea.21721>

Bale, R., & Anderson, M. (2024). *Teacher Identities of Graduate Teaching Assistants: How We (De)Legitimise GTAs’ Role Identities*. *29*(5). <https://doi.org/10.1080/13562517.2022.2109015>

Barnes, M. E., Maas, S. A., Roberts, J. A., & Brownell, S. E. (2021). Christianity as a Concealable Stigmatized Identity (CSI) among Biology Graduate Students. *CBE—Life Sciences Education*, *20*(1). <https://doi.org/10.1187/cbe.20-09-0213>

Bieber, J. P., & Worley, L. K. (2006). Conceptualizing the Academic Life: Graduate Students’ Perspectives. *The Journal of Higher Education*, *77*(6), 1009–1035. <https://doi.org/10.1080/00221546.2006.11778954>

Blaney, J. M., Wofford, A. M., Jeong, S., Kang, J., & Feldon, D. F. (2022). Autonomy and Privilege in Doctoral Education: An Analysis of STEM Students’ Academic and Professional Trajectories. *The Journal of Higher Education*, *93*(7), 1037–1063. <https://doi.org/10.1080/00221546.2022.2082761>

Butz, A. R., & Branchaw, J. L. (2020). “Entering Research” Learning Assessment (ERLA): Validity Evidence for an Instrument to Measure Undergraduate and Graduate Research Trainee Development. *CBE—Life Sciences Education*, *19*(2). <https://doi.org/10.1187/cbe.19-07-0146>

Cameron, C., Lee, H. Y., Anderson, C. B., Dahlstrom, E. K., & Chang, S. (2024). Helping mentors address scientific communication in STEM research training helps their mentees stay the course. *International Journal of STEM Education*, *11*(1). <https://doi.org/10.1186/s40594-024-00497-0>

Castro, A. R., & Collins, C. S. (2020). Asian American women in STEM in the lab with “White Men Named John.” *Science Education*, *105*(1), 33–61. <https://doi.org/10.1002/sce.21598>

Chemers, M. M., Zurbriggen, E. L., Syed, M., Goza, B. K., & Bearman, S. (2011). The Role of Efficacy and Identity in Science Career Commitment Among Underrepresented Minority Students. *Journal of Social Issues*, *67*(3), 469–491. <https://doi.org/10.1111/j.1540-4560.2011.01710.x>

Cidlinská, K. (2019). How not to scare off women: Different needs of female early-stage researchers in STEM and SSH fields and the implications for support measures. *Higher Education*, *78*(2), 365–388. <https://doi.org/10.1007/s10734-018-0347-x>

Cidlinska, K., Nyklova, B., Machovcova, K., Mudrak, J., & Zabrodska, K. (2023). “Why I don’t want to be an academic anymore?” When academic identity contributes to academic career attrition. *Higher Education*, *85*, 141–156. <https://doi.org/10.1007/s10734-022-00826-8>

Corrales, A., & Komperda, R. (2022). Characterizing Graduate Student Identity Development in the Context of an Integrated Research and Teaching Graduate Student Training Course. *Journal of Chemical Education*, *99*(4), 1747–1757. <https://doi.org/10.1021/acs.jchemed.1c00927>

Deters, J. R., Menon, M., Paretti, M. C., & Webb, M. (2021). *Exploring Interdisciplinary Identity Development Using Possible Selves: An Exploratory Study*. *1*. <https://doi.org/10.52202/066488-0045>

Donaldson, L. A. (2020). *Mixing it up: STEM labs as a space, place and process for rethinking gender equality* (2020-67311-252) [Drexel University]. <http://umiss.idm.oclc.org/login?url=https://search.ebscohost.com/login.aspx?direct=true&db=psyh&AN=2020-67311-252&site=ehost-live&scope=site>

Eren, E. (2021). Exploring Science Identity Development of Women in Physics and Physical Sciences in Higher Education. *Science & Education*, *30*(5), 1131–1158. <https://doi.org/10.1007/s11191-021-00220-3>

Estrada, M., Hernandez, PR., & Schultz, PW. (2018). A Longitudinal Study of How Quality Mentorship and Research Experience Integrate Underrepresented Minorities into STEM Careers. *CBE Life Sciences Education*, *17*, ar9-undefined. <https://doi.org/10.1187/cbe.17-04-0066>

Estrada, M., Woodcock, A., Hernandez, PR., & Schultz, PW. (2011). Toward a Model of Social Influence that Explains Minority Student Integration into the Scientific Community. *Journal of Educational Psychology*, *103*, 206–222. <https://doi.org/10.1037/a0020743>

Estrada, M., Zhi, Q., Nwankwo, E., & Gershon, R. (2019). The Influence of Social Supports on Graduate Student Persistence in Biomedical Fields. *CBE—Life Sciences Education*, *18*(3). <https://doi.org/10.1187/cbe.19-01-0029>

Frei, I., & Grund, C. (2020). Antecedents of overtime work: The case of junior academics: *German Journal of Human Resource Management: Zeitschrift Für Personalforschung*, *34*, 371–397. <https://doi.org/10.1177/2397002220903247>

Gonsalves, A. J. (2014). “Physics and the girly girl-there is a contradiction somewhere”: Doctoral students’ positioning around discourses of gender and competence in physics. *Cultural Studies of Science Education*, *9*(2), 503–521. <https://doi.org/10.1007/s11422-012-9447-6>

Gonsalves, A. J. (2018). Exploring how gender figures the identity trajectories of two doctoral students in observational astrophysics. *Physical Review Physics Education Research*, *14*(1). <https://doi.org/10.1103/PhysRevPhysEducRes.14.010146>

Gonsalves, A. J. (2020). Constructing inside-ness to physics: How matter comes to matter in physics identity work. *Cultural Studies of Science Education*, *15*(4), 911–921. <https://doi.org/10.1007/s11422-020-09999-z>

Google, A. N., Bowen, C. D., Brownell, S. E., & Barnes, M. E. (2024). Isolation, resilience, and faith: Experiences of Black Christian students in biology graduate programs. *Journal of Research in Science Teaching*, *61*(3), 591–624. <https://doi.org/10.1002/tea.21898>

Greco, L. M., & Kraimer, M. L. (2019). Goal-setting in the career management process: An identity theory perspective. *The Journal of Applied Psychology*, *105*(1), 40–57. <https://doi.org/10.1037/apl0000424>

Griffin, K., Gibbs, K. D., Bennett, J., Staples, C., & Robinson, T. (2015). “RESPECT ME FOR MY SCIENCE”: A BOURDIEUIAN ANALYSIS OF WOMEN SCIENTISTS’ INTERACTIONS WITH FACULTY AND SOCIALIZATION INTO SCIENCE. *Journal of Women and Minorities in Science and Engineering*, *21*(2), 159–179. <https://doi.org/10.1615/jwomenminorscieneng.2015011143>

Griffin, KA., Baker, VL., & O’Meara, K. (2020). Doing, Caring, and Being: “Good” Mentoring and Its Role in the Socialization of Graduate Students of Color in STEM. In *Knowledge Studies in Higher Education* (pp. 223–239). <https://link.springer.com/chapter/10.1007%2F978-3-030-33350-8_13>

Hancock, S., Hughes, G., & Walsh, E. (2017). Purist or Pragmatist? UK Doctoral Scientists’ Moral Positions on the Knowledge Economy. *Studies in Higher Education*, *42*(7), 1244–1258. <https://doi.org/10.1080/03075079.2015.1087994>

Hyater-Adams, S., Fracchiolla, C., Williams, T., Finkelstein, N., & Hinko, K. (2019). Deconstructing Black Physics Identity: Linking Individual and Social Constructs Using the Critical Physics Identity Framework. *Physcial Review Physics Education Research*, *15*(2), 020115. <https://doi.org/10.1103/PhysRevPhysEducRes.15.020115>

Hymer, C. B. (2021). *There’s more than meets the I(dentity): A multidimensional view of identity threat* (2021-94594-038) [University of South Carolina]. <https://scholarcommons.sc.edu/etd/6223/>

Kim-Prieto, C., Copeland, H. L., Hopson, R., Simmons, T., & Leibowitz, M. J. (2013). The role of professional identity in graduate school success for under-represented minority students. *Biochemistry and Molecular Biology Education*, *41*(2), 70–75. <https://doi.org/10.1002/bmb.20673>

Kulesza, A. E., & Gallant, D. J. (2023). Initial Development and Validation of the Biology Teaching Assistant Role Identity Questionnaire (BTARIQ). *Journal of College Science Teaching*, *52*(5), 80–90. <https://doi.org/10.1080/19434898.2023.12290251>

Lane, A. K., Hardison, C., Simon, A., & Andrews, T. C. (2019). A model of the factors influencing teaching identity among life sciences doctoral students. *Journal of Research in Science Teaching*, *56*(2), 141–162. <https://doi.org/10.1002/tea.21473>

Lerche, ADS., Burk, CL., & Wiese, BS. (2020). Dynamics Between Applied Work Demands and Related Competence Beliefs: A 4-Year Study With Scientists: *Journal of Career Development*, *49*, 089484532094159–089484532094392. <https://doi.org/10.1177/0894845320941593>

Malone, K. R., & Barabino, G. (2009). Narrations of race in STEM research settings: Identity formation and its discontents. *Science Education*, *93*(3), 485–510. <https://doi.org/10.1002/sce.20307>

Matthews, A., Mazzei, R., McAlister, A. M., Mills, B., & Song, Y. (2022). Graduate Student Participation in K-12 Science Outreach: Self-Reported Impact on Identity and Confidence of STEM Graduate Students. *Journal of Higher Education Outreach and Engagement*, *26*(3), 57–72.

Meuleners, J. S., Neuhaus, B. J., & Eberle, J. (2023). The role of scholarly identity and basic needs support during doctoral studies on career aspirations of early career scientists. *Studies in Higher Education*, *48*(12), 1952–1965. <https://doi.org/10.1080/03075079.2023.2217726>

Mondisa, J.-L. (2021). Examining the Academic and Professional Experiences of African American STEM PhD Mentors. *Journal of Negro Education*, *90*(1), 108–122.

Noppeney, R., Alisic, A., & Wiese, B. S. (2024). The interplay of career involvement and goal conflicts: An eight-wave study with STEM professionals. *Journal of Organizational Behavior*, *45*(3), 382–396. <https://doi.org/10.1002/job.2666>

Ong, M. (2005). Body Projects of Young Women of Color in Physics: Intersections of Gender, Race, and Science. *Social Problems*, *52*(4), 593–617. <https://doi.org/10.1525/sp.2005.52.4.593>

Park, J. J., Chuang, Y.-C., & Hald, E. S. (2018). Identifying Key Influencers of Professional Identity Development of Asian International STEM Graduate Students in the United States. *The Asia-Pacific Education Researcher*, *27*(2), 145–154. <https://doi.org/10.1007/s40299-018-0373-6>

Pfeifer, M. A., Zajic, C. J., Isaacs, J. M., Erickson, O. A., & Dolan, E. L. (2024). Beyond performance, competence, and recognition: Forging a science researcher identity in the context of research training. *International Journal of STEM Education*, *11*(1), 19. <https://doi.org/10.1186/s40594-024-00479-2>

Piatt, E., Merolla, D., Pringle, E., & Serpe, R. T. (2019). The Role of Science Identity Salience in Graduate School Enrollment for First-Generation, Low-Income, Underrepresented Students. *The Journal of Negro Education*, *88*(3), 269–280. <https://doi.org/10.7709/jnegroeducation.88.3.0269>

Porter, S. D., & Phelps, J. M. (2014). Beyond Skills: An Integrative Approach to Doctoral Student Preparation for Diverse Careers. *Canadian Journal of Higher Education*, *44*(3), 54–67. <https://doi.org/10.47678/cjhe.v44i3.186038>

Prefontaine, B., Mullen, C., Güven, J. J., Rispler, C., Rethman, C., Bergin, S. D., Hinko, K., & Fracchiolla, C. (2021). Informal Physics Programs as Communities of Practice: How Can Programs Support University Students’ Identities? *Physcial Review Physics Education Research*, *17*(2). <https://doi.org/10.1103/PhysRevPhysEducRes.17.020134>

Rattan, A., Savani, K., Komarraju, M., Morrison, M. M., Boggs, C. L., & Ambady, N. (2018). Meta-lay theories of scientific potential drive underrepresented students’ sense of belonging to science, technology, engineering, and mathematics (STEM). *Journal of Personality and Social Psychology*, *115*(1), 54–75. <https://doi.org/10.1037/pspi0000130>

Reid, J. W., & Gardner, G. E. (2020). Navigating Tensions of Research and Teaching: Biology Graduate Students’ Perceptions of the Research-Teaching Nexus within Ecological Contexts. *CBE—Life Sciences Education*, *19*(3). <https://doi.org/10.1187/cbe.19-11-0218>

Rethman, C., Perry, J., Donaldson, J. P., Choi, D., & Erukhimova, T. (2021). Impact of Informal Physics Programs on University Student Development: Creating a Physicist. *Physical Review Physics Education Research*, *17*(2). <https://doi.org/10.1103/PhysRevPhysEducRes.17.020110>

Rodriguez, I., Goertzen, R. M., Brewe, E., & Kramer, L. (2013). *Cookies as agents for community membership.* *1513*, 342–345. <https://doi.org/10.1063/1.4789722>

Rodriguez, I., Goertzen, R. M., Brewe, E., & Kramer, L. H. (2015). Developing a Physics Expert Identity in a Biophysics Research Group. *Physical Review Special Topics - Physics Education Research*, *11*(1). <https://doi.org/10.1103/PhysRevSTPER.11.010116>

Rodriguez, S. L., Perez, R. J., & Schulz, J. M. (2022). How STEM lab settings influence graduate school socialization and climate for students of color. *Journal of Diversity in Higher Education*, *15*(1), 58–72. <https://doi.org/10.1037/dhe0000361>

Scheitle, C. P., & Dabbs, E. (2021). Religiosity and identity interference among graduate students in the sciences. *Social Science Research*, *93*. <https://doi.org/10.1016/j.ssresearch.2020.102503>

Scheitle, C. P., Dabbs, E., & Darragh, R. (2021). Graduate Students’ Identification with Science: Differences by Demographics, Experiences, and Discipline. *SAGE Open*, *11*(4). <https://doi.org/10.1177/21582440211060832>

Stets, J. E., Brenner, P. S., Burke, P., & Serpe, R. T. (2017). The science identity and entering a science occupation. *Social Science Research*, *64*, 1–14. <https://doi.org/10.1016/j.ssresearch.2016.10.016>

Sugiyama, K., jaks, queen, Bilimoria, D., & Liu, H. (2024). Double-conscious professional self-expression of racial minority scientists-in-training. *Journal of Organizational Behavior*, *45*(3), 397–415. <https://doi.org/10.1002/job.2685>

Szelényi, K., Bresonis, K., & Mars, M. M. (2016). Who am I versus who can I become? Exploring women’s science identities in STEM Ph.D. programs. *The Review of Higher Education*, *40*(1), 1–31. <https://doi.org/10.1353/rhe.2016.0036>

Thomas, S. D., Ali, A., Alcover, K., Augustin, D., & Wilson, N. (2021). Social and Professional Impact of Learning Communities Within the Alliances for Graduate Education and the Professoriate Program at Michigan State University. *Frontiers in Psychology*, *12*. <https://doi.org/10.3389/fpsyg.2021.734414>

Tidman, J. (2015). “I want to make sure that I don’t let physics stop me from being a woman”: A critical discursive analysis of a group discussion with female doctoral physics students on issues of gender and identity construction in a male-dominated field. *Psychology of Women Section Review*, *17*(1), 33–38.

Tomlinson, M., & Jackson, D. (2019). Professional identity formation in contemporary higher education students. *Studies in Higher Education*, *46*(4), 885–900. <https://doi.org/10.1080/03075079.2019.1659763>

Tran, M. C. (2011). *How Can Students Be Scientists and Still Be Themselves: Understanding the Intersectionality of Science Identity and Multiple Social Identities through Graduate Student Experiences* [University of California, Los Angeles]. <http://umiss.idm.oclc.org/login?url=https://www.proquest.com/dissertations-theses/how-can-students-be-scientists-still-themselves/docview/1158045574/se-2>

Vázquez, E. (2023). Negative Emotions, Social Isolation, and Impostor Syndrome in the Pursuit of Professional Mastery in Research Universities. *International Journal for Academic Development*, *28*(4), 495–508. <https://doi.org/10.1080/1360144X.2022.2072848>

Welch-Devine, M., Pidaparti, R., Carmichael, K. P., Rechtman, J. E., Walker, B. B., & Coffield, J. A. (2018). *Training model for 21st century graduate education through engagement to action*. *2018-June*, 10. <https://doi.org/10.18260/1-2--31153>

Wilkins-Yel, K. G., Hyman, J., & Zounlome, N. O. O. (2019). Linking intersectional invisibility and hypervisibility to experiences of microaggressions among graduate women of color in STEM. *Journal of Vocational Behavior*, *113*, 51–61. <https://doi.org/10.1016/j.jvb.2018.10.018>

Wood, C. V., Campbell, P. B., & McGee, R. (2016). “An incredibly steep hill:” How gender, race, and class shape perspectives on academic careers among beginning biomedical phd students. *Journal of Women and Minorities in Science and Engineering*, *22*(2), 159–181. <https://doi.org/10.1615/jwomenminorscieneng.2016014000>

Yadav, A., Seals, C. D., Sullivan, C. M. S., Lachney, M., Clark, Q., Dixon, K. G., & Smith, M. J. T. (2020). The forgotten scholar: Underrepresented minority postdoc experiences in stem fields. *Educational Studies: Journal of the American Studies Association*, *56*(2), 160–185. <https://doi.org/10.1080/00131946.2019.1702552>
